# Supplementary material for: Gut and oral microbiota associations with viral mitigation behaviors during the COVID-19 pandemic
Source: PubMed Central journal article supplement (PMC9500509; doi:10.3389/fcimb.2022.966361), 2022-09-09
Supplement: Presentation_1.pdf [file Presentation_1.pdf]

# **Supplemental Methods**

## Cluster Influencers Analysis

The purpose of the cluster influencers analysis is to identify which taxa are responsible for a cluster's separation from its peer clusters. Clustering depends on the distance metric (e.g., Euclidean, Manhattan, Morisita-Horn, Jaccard, etc.) used to compare samples and the clustering algorithm (e.g., Ward's minimum variance, complete-linkage, etc.) used to join (or split) members together (or apart) into clusters. For compositional data, taxonomic categorical counts for each sample are first normalized (to sum to 1) to produce relative abundance profiles, then a distance metric is calculated pairwise between these profiles. Since the same dataset may yield different clusters depending on metric and clustering algorithm, the separation between two clusters cannot be simply attributed to differences in their taxonomic abundance, as this was not the criteria used that separated them.

To identify the taxonomic contributors to cluster separation, an analysis of variance (ANOVA) approach is taken by using the  $R^2$  statistic between two clusters to measure cluster separation. Here we define  $R^2$  as the sum of squares between (SSB) / sum of squares total (SST). To determine whether a taxon of interest contributed to the separation between two clusters, we first calculate the reduced- $R^2$ , which is the  $R^2$  when the taxon of interest is removed from all samples, then we compare it against the full- $R^2$  which includes all taxa. If the log-ratio of the reduced- $R^2$ /full- $R^2$  is negative, then that taxon contributed to the two clusters separating from each other. If the log-ratio is positive, then that taxon contributed "noise" to the two clusters and can be ignored. This is done for all taxa of interest, usually the top 15-35 taxa in abundance. Taxa that contributed to cluster separation are called "Cluster Differentiators". Taxa that are consistently cluster differentiator against other clusters, are called "Cluster Unifiers". A set of cluster unifiers is considered the defining characteristic of that cluster, or a microbiome "type" or configuration.

Since hierarchical clustering was used to generate our clusters, we also use an iterative tree cutting algorithm to generate cluster cuts from cuts  $k = 2$  to 10, i.e.  $(k-1)$  groups of clusters, with cluster identifiers in each grouping labeled  $cl = 1$  to  $k$ . Cluster unifiers are calculated for each cut and summarized in a hierarchically structured table. See Supplemental Figure 5 and Figure 6 for the cluster unifiers for stool and saliva, respectively.

## Cluster Transition Analyses

The goal of cluster transition analysis is to understand how a cohort's microbiota has changed between their pre- and early pandemic sample, given their pre-pandemic microbiota composition and factors, such as demographics and questionnaire responses. The assumption that is made when modeling with clustering is that a cluster represents a particular state or configuration of the microbiota from a sample that cannot be meaningfully reduced further. While there may be an infinite number of possible compositions that can be brought together in a cluster, each variation is not considered consequential when considering that cluster as whole. In other words, the members of the cluster may be treated homogeneously if they clustered together, and should be considered different in state of configuration, if they cluster separately.

To identify the possible microbiota states that may exist in a cohort, both the pre- and early pandemic samples were clustered together. Pairwise sample distancing was performed with the Manhattan distance metric, followed by hierarchical clustering with Ward's minimum variance criterion. The tree resultant from hierarchical clustering was cut iteratively from  $k = 2$  to 7. At each cut, a  $k \times k$  contingency table was computed with the rows and the columns containing the pre- and early pandemic cluster identifiers, respectively. For example, at  $k = 2$ , a contingency table would be a  $2 \times 2$  matrix. Please examine Figure 3, "Cluster Transition", for examples of stool and saliva sample "contingency tables" drawn as a scatter plot, cut at  $k = 6$  and  $k = 4$ , respectively.

When a sample's pre- and early pandemic sample are in the same cluster, they are considered to have not changed clusters, i.e., state or configuration. From these initial data structures, conditional and joint probabilities may be calculated to quantify whether some pre-pandemic clusters have a stronger probability of transitioning towards one early pandemic cluster versus another. To incorporate questionnaire responses and demographic data, two models were fit: "Departers" and "Arrivers". In the "Departers" model, the members of each pre-pandemic cluster were split into two groups, the "remainers" and the "departers". The pre- and early pandemic samples of the remainers share the sample cluster id. The departers pre- and early pandemic belong in different clusters. For each pre-pandemic cluster, a logistic regression was fit with the departers/remainers as a response to subject demographics and questionnaire responses. See Supplemental Figure 4. "Cluster Transition Departers". In contrast, for the "Arrivers" model, the members of each early pandemic cluster were examined. Remainers were subjects that had both pre- and early pandemic samples in the same cluster, whereas the "arrivers" had a sample from a different pre-pandemic cluster. Logistic regression was then computed with the arrivers/remainers as a response to subject demographics, questionnaire responses, and pre-pandemic cluster id. Thus, the "Arrivers" analysis is conditional on the subjects' pre-pandemic state. See Supplemental Figure 3. "Cluster Transition Arrivers".

Since the association between model predictors (demographics and questionnaire responses) depends on the cut  $k$ , the logistic regressions are calculated across all the clusters (identified 1 to  $k$ ) generated at each cut. P-values are accumulated for each predictor across all the cuts, and the cut with the most significant p-value is considered the best. If variable-to-cluster associations from multiple cuts of  $k$  are equally significant, then the cut  $k$  with the lowest value is considered the best association/cut combination, by Occam's razor.

## **P-values**

P-values have not been adjusted for multiple testing. Adjustments for multiple testing assume every test is independent. Our analyses on diversity, distance, and abundance frequently overlap in their associations as the same taxa are contributing to the three different analyses, thus correcting for each test would over penalize the significance of each calculated association. With respect to factors included in the model, some demographic variables may be considered nuisance variables, such as age, ethnicity, sex, and BMI (for cross-sectional analyses), since these may not be of direct interest, but necessary to control for. Each of the taxa considered in the abundance analyses, 25, should be considered separate tests, but the reader should be more discerning

towards accepting statistically significant associations with taxa with lower abundance. Excluding demographic variables, the number of questionnaire responses included in the models were 21. A summary of noteworthy associations that were included in the manuscript have been included into Supplemental Table 1. “Associations Comparisons”.

## **R Analytical Code**

The R code used for the “Cluster Influencers Analysis” and “Cluster Transition Analyses” has been provided on GitHub at:

<https://github.com/CMM-Release/MB-COVID>

The software was written to be executed from the Linux command line and is part of a larger suite of analytical tools. Experience with R programming, cluster analyses, ANOVA, and multinomial logistic regression is suggested.

# **Supplemental Tables**

|                                                 | <u>Stool</u> | <u>Saliva</u> |
|-------------------------------------------------|--------------|---------------|
| Questionnaire Respondents                       | <b>588</b>   | <b>588</b>    |
| <i>Early Pandemic (EP) Respondents Excluded</i> | <i>(277)</i> | <i>(370)</i>  |
| EP Cross-Sectional Analysis Subjects            | <b>311</b>   | <b>218</b>    |
| <i>EP Subjects Excluded</i>                     | <i>(23)</i>  | <i>(129)</i>  |
| PP-EP Paired Analysis Subjects                  | <b>288</b>   | <b>89</b>     |

Supplemental Table 1, "Sample Exclusions"

This table reports the sample sizes that were available for the statistical analyses of the stool and saliva samples. From the ongoing MedBio observational cohort, 588 questionnaires responses were collected. For the early pandemic (EP) cross-sectional analyses, 277 stool and 370 saliva contributing subjects were excluded for reasons including: difficulty collecting early pandemic samples during lockdown, unavailable BMI information, or 16S rRNA gene sequencing not passing quality control (QC). For the paired analyses, 23 stool and 129 saliva EP samples were excluded because they lacked a matching pre-pandemic sample. The most common reason for the exclusion of EP subjects was that although they were enrolled, they had not provided the necessary sample type prior to the lockdown date cutoff. The majority of subjects providing saliva samples, also provided stool samples.

### Early Pandemic Cross-Sectional

| Stool | <u>Diversity</u>                | <u>Coefficient</u> | <u>P-value</u> |
|-------|---------------------------------|--------------------|----------------|
|       | Immune System Disease / Tail    | -1.137             | 0.0000         |
|       | Immune System Disease / Shannon | -0.685             | 0.0000         |
|       | Age / Tail                      | 0.025              | 0.0003         |
|       | Age / Shannon                   | 0.018              | 0.0003         |
|       | Health / Tail                   | 0.230              | 0.0246         |
|       | Health / Shannon                | 0.157              | 0.0282         |
|       | GAD7 Anxiety / Shannon          | 0.134              | 0.0676         |
|       | Pre-Pandemic Exercise / Shannon | 0.279              | 0.0689         |
|       | Pre-Pandemic Exercise / Tail    | 0.374              | 0.0886         |

|  | <u>Distance</u>          | <u>R<sup>2</sup></u> | <u>P-value</u> |
|--|--------------------------|----------------------|----------------|
|  | Days Into Early Pandemic | 0.015                | 0.0000         |
|  | BMI                      | 0.010                | 0.0016         |
|  | Age                      | 0.012                | 0.0004         |
|  | Health                   | 0.011                | 0.0005         |
|  | Sex (Female)             | 0.019                | 0.0000         |
|  | Immune System Disease    | 0.016                | 0.0000         |
|  | Social Distancing        | 0.005                | 0.0627         |

|  | <u>Abundance</u>                                    | <u>Coefficient</u> | <u>P-value</u> |
|--|-----------------------------------------------------|--------------------|----------------|
|  | Sex (Female) / Prevotellaceae_uncl                  | -1.532             | 0.0000         |
|  | Sex (Female) / Prevotella                           | -1.480             | 0.0002         |
|  | Sex (Female) / Bacteroides                          | 0.828              | 0.0008         |
|  | Age / Alistipes                                     | 0.053              | 0.0000         |
|  | Immune System Disease / UCG_002                     | -1.638             | 0.0000         |
|  | Immune System Disease / Subdoligranulum             | -1.690             | 0.0000         |
|  | Immune System Disease / Ruminococcus                | -1.538             | 0.0002         |
|  | Immune System Disease / Lachnospiraceae_NK4A136_grp | -1.112             | 0.0006         |
|  | Immune System Disease / Fusicatenibacter            | -1.189             | 0.0008         |

### Pre / Early Pandemic Paired

|  | <u>Diversity</u>       | <u>Coefficient</u> | <u>P-value</u> |
|--|------------------------|--------------------|----------------|
|  | dBMI / Tail            | -0.229             | 0.0232         |
|  | Smoking History / Tail | -0.781             | 0.0317         |
|  | Number of Pets / Tail  | 0.709              | 0.0406         |

|  | <u>Distance</u>          | <u>Coefficient</u> | <u>P-value</u> |
|--|--------------------------|--------------------|----------------|
|  | Days into Pre-Pandemic   | 0.000              | 0.0023         |
|  | Days into Early Pandemic | 0.002              | 0.0265         |
|  | Pre-Pandemic BMI         | -0.010             | 0.0328         |
|  | Health                   | -0.068             | 0.0178         |
|  | Diabetes                 | 0.151              | 0.0708         |
|  | Number of Cohabitants    | 0.080              | 0.0907         |

|  | <u>Abundance</u>                             | <u>Coefficient</u> | <u>P-value</u> |
|--|----------------------------------------------|--------------------|----------------|
|  | Immune System Disease / Alistipes            | 1.298              | 0.0000         |
|  | Immune System Disease / Lachnospiraceae_uncl | 0.694              | 0.0010         |
|  | Immune System Disease / Bacteroides          | 0.874              | 0.0011         |
|  | Immune System Disease / Faecalibacterium     | 0.971              | 0.0057         |
|  | Asthma / Ruminococcus                        | 1.860              | 0.0008         |
|  | Days into Pre-Pandemic/ Fusicatenibacter     | 0.002              | 0.0003         |
|  | Days into Early Pandemic / Lachnoclostridium | 0.015              | 0.0005         |
|  | Pre-Pandemic BMI / Prevotella                | 0.119              | 0.0004         |
|  | dBMI / UCG_002                               | -0.276             | 0.0004         |

|                                                |        |        |                                        |        |        |
|------------------------------------------------|--------|--------|----------------------------------------|--------|--------|
| Days into Early Pandemic / Prevotella          | -0.025 | 0.0002 | dBMI / Escherichia_Shigella            | 0.301  | 0.0045 |
| Days into Early Pandemic / Prevotellaceae_uncl | -0.013 | 0.0005 | dBMI / Subdoligranulum                 | -0.219 | 0.0046 |
| BMI / Bacteroides                              | 0.081  | 0.0006 | Diabetes / Agathobacter                | 1.508  | 0.0099 |
| BMI / Lachnoclostridium                        | 0.082  | 0.0006 | PHQ9 Depression / Lachnospiraceae_uncl | -0.378 | 0.0025 |
|                                                |        |        | Education Level / Prevotella           | 0.354  | 0.0088 |

**Cluster Transistion**

|                                    | <b><u>Coefficient</u></b> | <b><u>P-value</u></b> |
|------------------------------------|---------------------------|-----------------------|
| Sex (Female) / Depart cl=2, k=3    | -2.751                    | <0.001                |
| COVID Worries / Depart cl=2, k=6   | 0.442                     | 0.0060                |
| COVID Worries / Arrive cl=3, k=6   | -0.370                    | <0.001                |
| Asthma / Arrive cl=1, k=2          | 4.197                     | 0.0090                |
| Cancer / Arrive cl=2, k=5          | 1.630                     | 0.0050                |
| Social Distance / Arrive cl=1, k=2 | 4.197                     | 0.0090                |

| <b>Saliva</b> | <b><u>Diversity</u></b>       | <b><u>Coefficient</u></b> | <b><u>P-value</u></b> | <b><u>Diversity</u></b>      | <b><u>Coefficient</u></b> | <b><u>P-value</u></b> |
|---------------|-------------------------------|---------------------------|-----------------------|------------------------------|---------------------------|-----------------------|
|               | Early Pandemic BMI / Tail     | 0.045                     | 0.0150                | Immune System Disease / Tail | 1.261                     | 0.0116                |
|               | Early Pandemic BMI / Shannon  | 0.026                     | 0.0190                | Education Level / Tail       | -0.344                    | 0.0687                |
|               | High Blood Pressure / Shannon | -0.197                    | 0.0873                | PHQ9 Depression / Tail       | 0.583                     | 0.0719                |
|               | GAD7 Anxiety / Tail           | 0.260                     | 0.0266                | Number of Cohabitants / Tail | -0.774                    | 0.0973                |
|               | GAD7 Anxiety / Shannon        | 0.133                     | 0.0595                | GAD7 Anxiety / Tail          | -0.472                    | 0.0986                |
|               | Number of Pets / Shannon      | -0.223                    | 0.0516                |                              |                           |                       |

|  | <b><u>Distance</u></b>   | <b><u>R<sup>2</sup></u></b> | <b><u>P-value</u></b> | <b><u>Distance</u></b> | <b><u>Coefficient</u></b> | <b><u>P-value</u></b> |
|--|--------------------------|-----------------------------|-----------------------|------------------------|---------------------------|-----------------------|
|  | Days into Early Pandemic | 0.020                       | 0.0003                | Social Distancing      | 0.265                     | 0.0277                |
|  | COVID Worries            | 0.009                       | 0.0568                | COVID Worries          | -0.027                    | 0.0754                |
|  | Number of Pets           | 0.009                       | 0.0456                |                        |                           |                       |
|  | Health                   | 0.021                       | 0.0003                |                        |                           |                       |
|  | Smoking History          | 0.016                       | 0.0028                |                        |                           |                       |

|  | <b><u>Abundance</u></b>                  | <b><u>Coefficient</u></b> | <b><u>P-value</u></b> | <b><u>Abundance</u></b>      | <b><u>Coefficient</u></b> | <b><u>P-value</u></b> |
|--|------------------------------------------|---------------------------|-----------------------|------------------------------|---------------------------|-----------------------|
|  | Days into Early Pandemic / Streptococcus | -0.015                    | 0.0000                | COVID Worries / Oribacterium | 0.276                     | 0.0030                |



|                                           |        |        |                               |       |        |
|-------------------------------------------|--------|--------|-------------------------------|-------|--------|
| Days into Early Pandemic / Bergeyella     | 0.012  | 0.0006 | COVID Worries / Campylobacter | 0.190 | 0.0085 |
| Days into Early Pandemic / Capnocytophaga | 0.013  | 0.0017 |                               |       |        |
| Days into Early Pandemic / Oribacterium   | 0.012  | 0.0091 |                               |       |        |
| Health / Neisseria                        | 1.026  | 0.0001 |                               |       |        |
| Health / Alloprevotella                   | 0.583  | 0.0061 |                               |       |        |
| Health / Veillonellaceae_uncl             | 0.582  | 0.0072 |                               |       |        |
| High Blood Pressure / Capnocytophaga      | -0.898 | 0.0004 |                               |       |        |
| High Blood Pressure / Fusobacterium       | -0.705 | 0.0037 |                               |       |        |
| High Blood Pressure / Bergeyella          | -0.548 | 0.0099 |                               |       |        |
| Diabetes / Veillonella                    | 0.885  | 0.0029 |                               |       |        |
| COVID Worries / Lactobacillus             | -0.183 | 0.0050 |                               |       |        |
| Asthma / Yersinia                         | 0.773  | 0.0056 |                               |       |        |

Supplemental Table 2, “Associations with Stool and Saliva Samples”.

This table summarizes the significant associations found in the stool and saliva analyses organized so that the various metrics and methods may be compared. Each association includes a description, coefficient, and p-value. The left and right columns contain the associations for the “Early Pandemic Cross-Sectional” analyses and “Pre / Early Pandemic Paired” analyses, respectively. The top and bottom analyses are split into “Stool” and “Saliva” analyses, respectively. Within each sample type by analyses grouping, the sub-analyses “Diversity”, “Distance”, and “Abundance” are shown. The diversity analyses contain associations made with the Tail or Shannon diversity index. The distance analyses used the Manhattan distance. The abundance analyses used the additive-log-ratio transformed abundances. P-values are not adjusted for multiple testing, but only the most noteworthy were included (See Supplemental Methods P-values).

# **Supplemental Figures**

# Stool

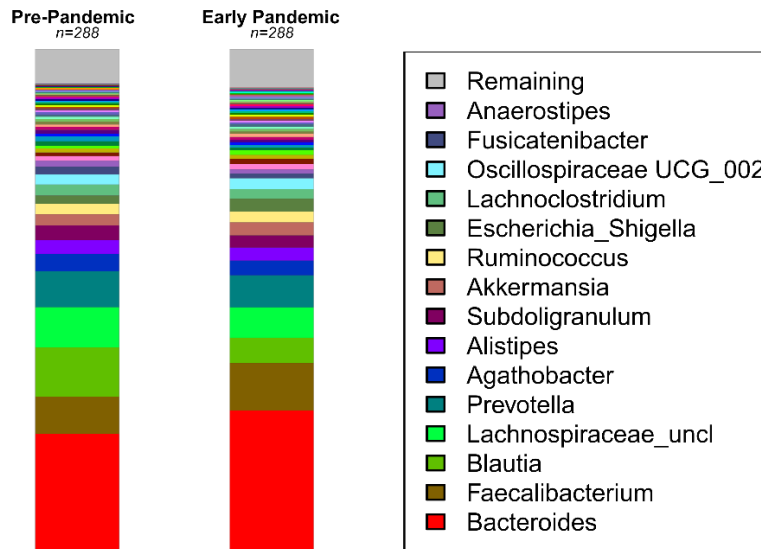

# Saliva

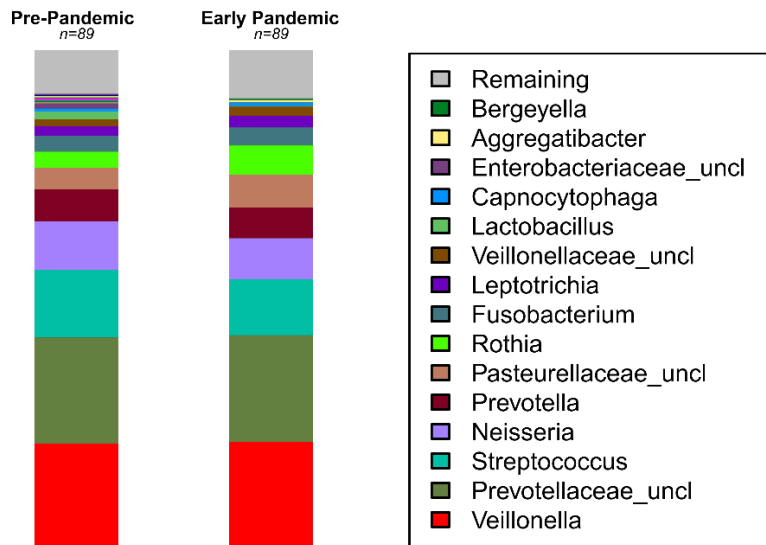

Supplemental Figure 1, “Paired Compositional Stacked Bar Plots”

The top and bottom stacked bar plots represent the average microbiota compositions for stool and saliva samples, respectively, that were analyzed for the paired analyses. The pre- and early pandemic compositions are represented on the left and right, respectively. The most abundant taxa are located on the bottom of the stacked bar plots and their corresponding color coding can be found in the sample type specific legend on the right. The most abundant taxa in stool included *Bacteroides* and *Faecalibacterium*. The most abundant taxa in saliva included *Veillonella* and *Prevotellaceae*. Only the top 15 taxa were labelled, although additional taxa were represented. Taxa with abundances too small to represent with colors were placed into the grey “Remaining” category.

**Questionnaire Response Correlations**  
(Bonferroni Corrected:  $p\text{-val} < 0.05$ )

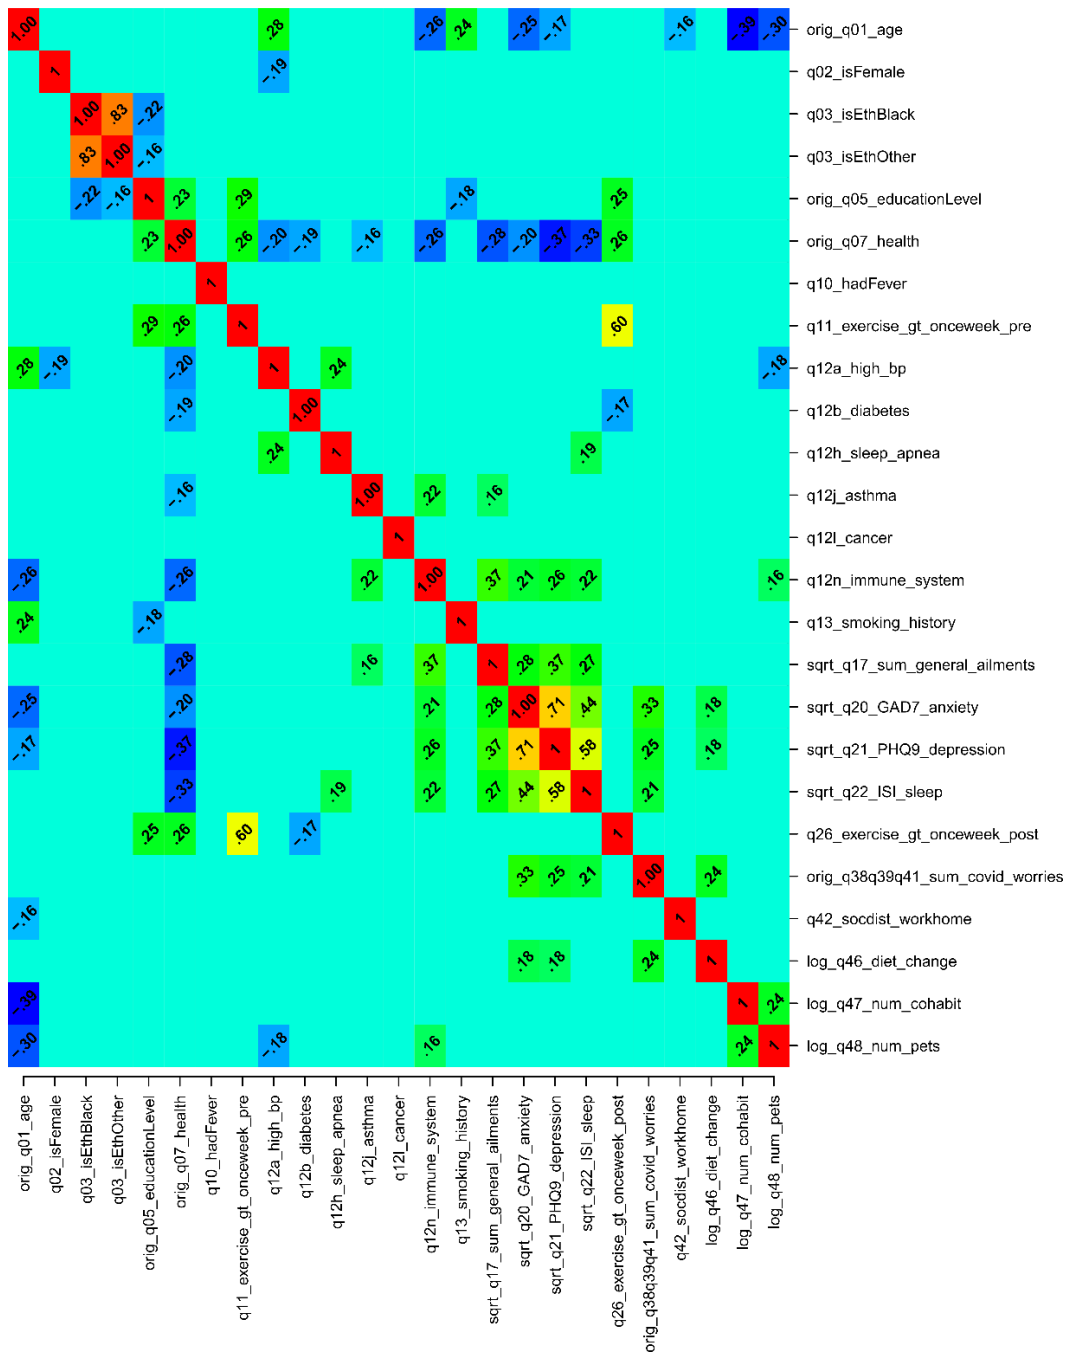

Arrivers: P-val<0.01

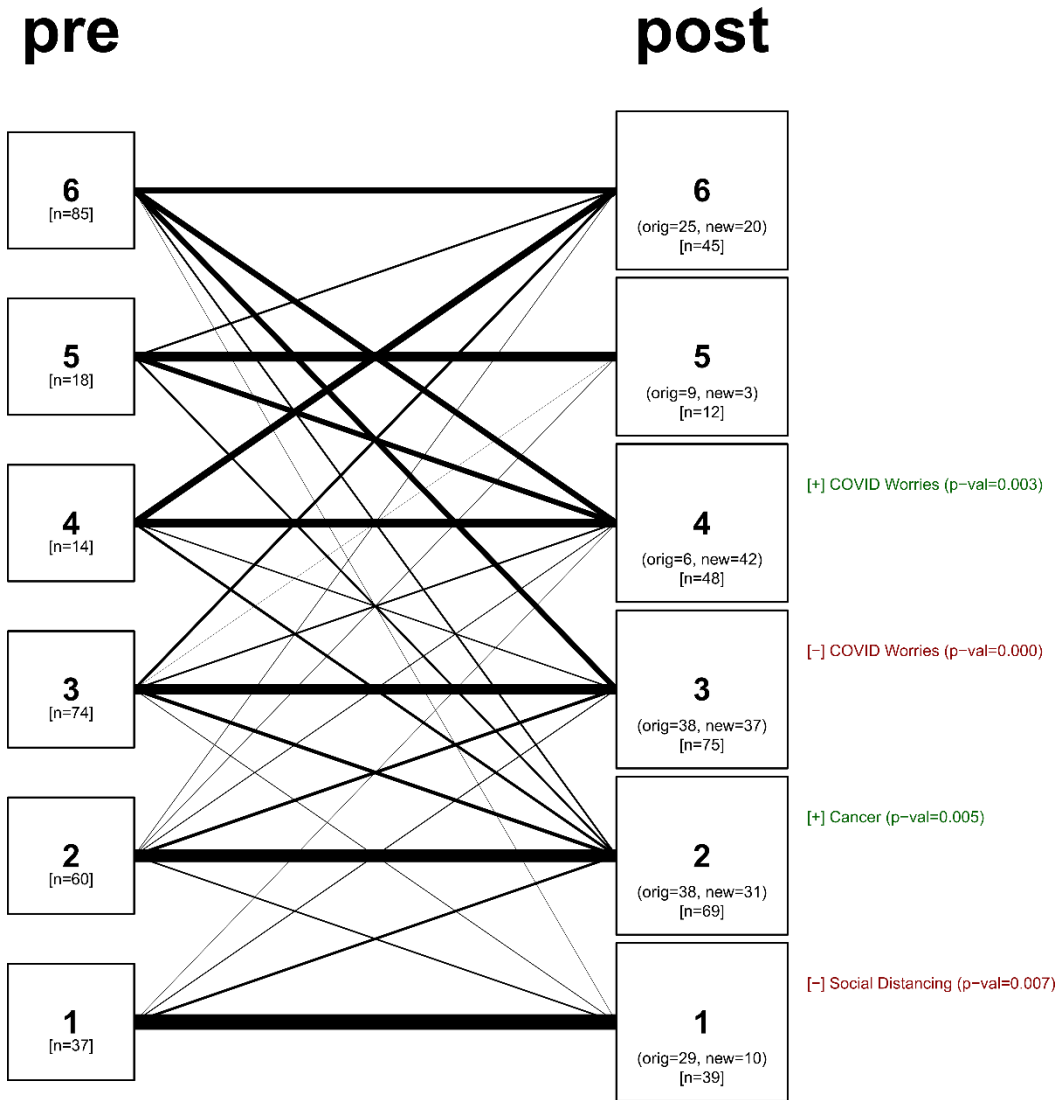

Supplemental Figure 3, “Stool Cluster Transition Departers at k = 6”

Cluster departers are subjects whose early pandemic samples do not cluster together with their pre-pandemic samples. When the hierarchical clustering was cut at k = 6, a positive association between COVID Worries (p-value = 0.006) and the departers from cl = 3 was identified. Of the original 74 subjects in cl = 3, 36 (48.6%) left (went to another cluster) and 38 (51.4%) stayed in the same cluster. Questionnaire questions were associated with departers with logistic regression. Although this figure represents k = 6, this analysis was performed across cuts k = 2 to 7. Each questionnaire response may find its associations with departers at multiple cuts of k, so the cut with the most significant association is reported per questionnaire response.

## Departures: P-value<0.01

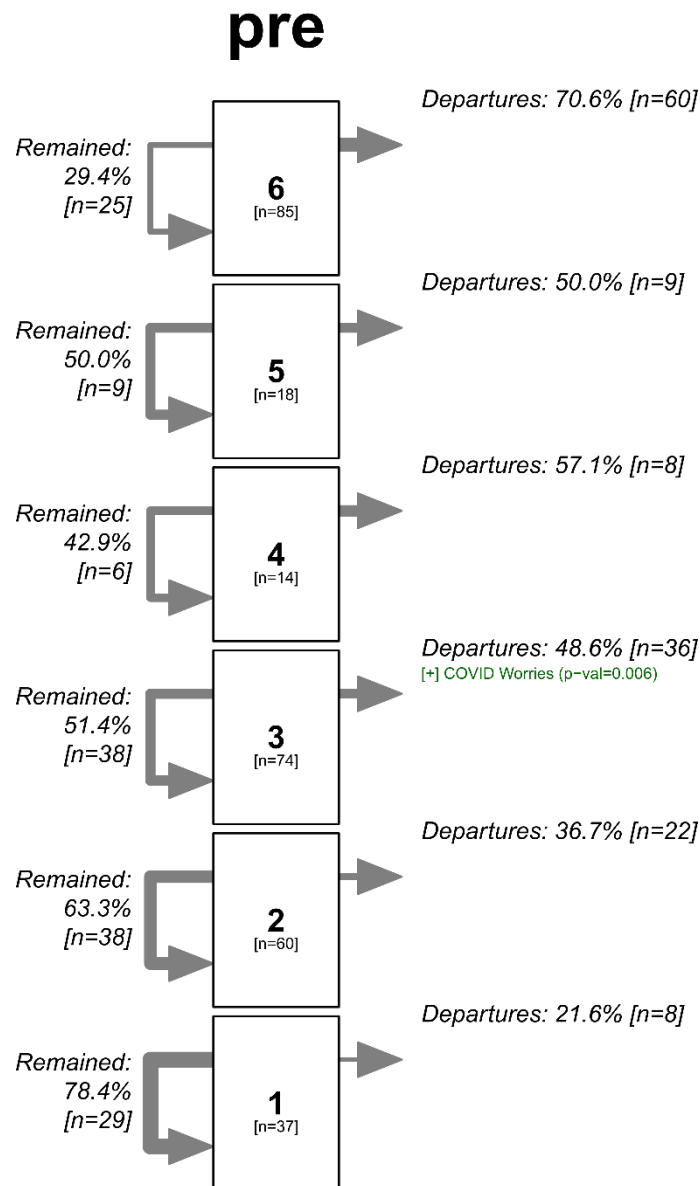

Supplemental Figure 4, “Stool Cluster Transition Arrivers at k = 6”

The cluster arriver analyses identify the factors that are associated with a subject moving into an early pandemic cluster. When the hierarchical clustering was cut at k = 6, COVID Worries was associated with more subjects transitioning into cl = 4 and fewer subjects transitioning into cl = 3. There were more subjects transitioning into cl = 2 associated with Cancer, and fewer transitioning into cl = 1 associated with Social Distancing. The cluster sizes of the pre-pandemic and early pandemic clusters are annotated in each cluster square. The line thickness connecting pre-pandemic to early pandemic clusters is proportional to the number of subjects moving between pre- and early pandemic clusters. The early pandemic clusters are annotated with cluster size as well as the composition of original and newly arriving members. Logistic regression was used to calculate associations with questionnaire responses while controlling for pre-pandemic cluster membership. Although associations with Cancer and Social distancing are show in this figure, Cancer had a stronger association at (k=5, cl = 2), and Social Distancing had a strong association at (k=10, cl=7).

Stool: Top Cluster Unifiers

|    |                                                                  |                                               |                                                                          |                                                                          |                                                                         |                                                                         |                                                                        |                                                                        |                                                                        |                                                                        |                                                                        |                                                                           |  |
|----|------------------------------------------------------------------|-----------------------------------------------|--------------------------------------------------------------------------|--------------------------------------------------------------------------|-------------------------------------------------------------------------|-------------------------------------------------------------------------|------------------------------------------------------------------------|------------------------------------------------------------------------|------------------------------------------------------------------------|------------------------------------------------------------------------|------------------------------------------------------------------------|---------------------------------------------------------------------------|--|
| 2  | 1<br>Firmicutes<br>Firmicutes_uncl                               |                                               | 2                                                                        |                                                                          |                                                                         |                                                                         |                                                                        |                                                                        |                                                                        |                                                                        |                                                                        |                                                                           |  |
| 3  | 1<br>Firmicutes<br>Firmicutes_uncl<br>OTU_002<br>Lactobacillales |                                               | 2<br>Bacteroidetes                                                       |                                                                          |                                                                         |                                                                         | 3<br>Bacteroidetes<br>Bacteroidetes_uncl<br>OTU_002<br>Firmicutes_uncl |                                                                        |                                                                        |                                                                        |                                                                        |                                                                           |  |
| 4  | 1<br>Firmicutes<br>Firmicutes_uncl<br>Lactobacillales            |                                               | 2<br>Bacteroidetes                                                       |                                                                          |                                                                         |                                                                         | 3<br>Bacteroidetes<br>Bacteroidetes_uncl<br>OTU_002                    | 4<br>Bacteroidetes<br>Bacteroidetes_uncl<br>OTU_002<br>Firmicutes_uncl |                                                                        |                                                                        |                                                                        |                                                                           |  |
| 5  | 1<br>Firmicutes<br>Firmicutes_uncl<br>Lactobacillales            |                                               | 2<br>Actinobacteria<br>Actinobacteria_uncl<br>OTU_002<br>Firmicutes_uncl |                                                                          | 3<br>Bacteroidetes                                                      |                                                                         |                                                                        | 4<br>Bacteroidetes<br>Bacteroidetes_uncl<br>OTU_002                    | 5<br>Bacteroidetes<br>Bacteroidetes_uncl<br>OTU_002<br>Firmicutes_uncl |                                                                        |                                                                        |                                                                           |  |
| 6  | 1<br>Firmicutes<br>Firmicutes_uncl<br>Lactobacillales            |                                               | 2<br>Actinobacteria<br>Actinobacteria_uncl<br>OTU_002<br>Firmicutes_uncl |                                                                          | 3<br>Bacteroidetes<br>Firmicutes_uncl<br>Actinobacteria_uncl<br>OTU_002 |                                                                         | 4<br>Bacteroidetes<br>Bacteroidetes_uncl<br>OTU_002<br>Firmicutes_uncl |                                                                        | 5<br>Bacteroidetes<br>Bacteroidetes_uncl<br>OTU_002                    | 6<br>Bacteroidetes<br>Bacteroidetes_uncl<br>OTU_002<br>Firmicutes_uncl |                                                                        |                                                                           |  |
| 7  | 1<br>Firmicutes<br>Firmicutes_uncl                               |                                               | 2<br>Actinobacteria<br>Actinobacteria_uncl<br>OTU_002                    | 3<br>Actinobacteria<br>Actinobacteria_uncl<br>OTU_002<br>Firmicutes_uncl |                                                                         | 4<br>Bacteroidetes<br>Firmicutes_uncl                                   |                                                                        | 5<br>Bacteroidetes<br>Bacteroidetes_uncl<br>OTU_002<br>Firmicutes_uncl |                                                                        | 6<br>Bacteroidetes<br>Bacteroidetes_uncl<br>OTU_002                    | 7<br>Bacteroidetes<br>Bacteroidetes_uncl<br>OTU_002<br>Firmicutes_uncl |                                                                           |  |
| 8  | 1<br>Firmicutes<br>Firmicutes_uncl                               |                                               | 2<br>Actinobacteria<br>Actinobacteria_uncl<br>OTU_002                    | 3<br>Actinobacteria<br>Actinobacteria_uncl<br>OTU_002<br>Firmicutes_uncl |                                                                         | 4<br>Bacteroidetes<br>Firmicutes_uncl                                   |                                                                        | 5<br>Bacteroidetes<br>Bacteroidetes_uncl<br>OTU_002<br>Firmicutes_uncl |                                                                        | 6<br>Bacteroidetes<br>Bacteroidetes_uncl<br>OTU_002                    | 7<br>Bacteroidetes<br>Bacteroidetes_uncl<br>OTU_002                    | 8<br>Actinobacteria<br>Actinobacteria_uncl<br>OTU_002<br>Firmicutes_uncl  |  |
| 9  | 1<br>Firmicutes<br>Firmicutes_uncl                               |                                               | 2<br>Actinobacteria<br>Actinobacteria_uncl<br>OTU_002                    | 3<br>Actinobacteria<br>Actinobacteria_uncl<br>OTU_002<br>Firmicutes_uncl |                                                                         | 4<br>Bacteroidetes<br>Firmicutes_uncl<br>Actinobacteria_uncl<br>OTU_002 |                                                                        | 5<br>Bacteroidetes<br>Bacteroidetes_uncl<br>OTU_002<br>Firmicutes_uncl | 6<br>Bacteroidetes<br>Bacteroidetes_uncl<br>OTU_002                    | 7<br>Bacteroidetes<br>Bacteroidetes_uncl<br>OTU_002                    | 8<br>Bacteroidetes<br>Bacteroidetes_uncl<br>OTU_002                    | 9<br>Actinobacteria<br>Actinobacteria_uncl<br>OTU_002<br>Firmicutes_uncl  |  |
| 10 | 1<br>Firmicutes<br>Firmicutes_uncl<br>OTU_002                    | 2<br>Firmicutes<br>Firmicutes_uncl<br>OTU_002 | 3<br>Actinobacteria<br>Actinobacteria_uncl<br>OTU_002                    | 4<br>Actinobacteria<br>Actinobacteria_uncl<br>OTU_002<br>Firmicutes_uncl |                                                                         | 5<br>Bacteroidetes<br>Firmicutes_uncl<br>Actinobacteria_uncl<br>OTU_002 |                                                                        | 6<br>Bacteroidetes<br>Bacteroidetes_uncl<br>OTU_002<br>Firmicutes_uncl | 7<br>Bacteroidetes<br>Bacteroidetes_uncl<br>OTU_002                    | 8<br>Bacteroidetes<br>Bacteroidetes_uncl<br>OTU_002                    | 9<br>Bacteroidetes<br>Bacteroidetes_uncl<br>OTU_002                    | 10<br>Actinobacteria<br>Actinobacteria_uncl<br>OTU_002<br>Firmicutes_uncl |  |

Supplemental Figure 5, "Stool Cluster Unifiers"

Cluster unifiers for the pre- and early pandemic stool samples are organized into a hierarchically structured table. Each row represents a cut from k=2 to 10, labeled on the left y-axis. Each row represents the clusters that are generated when the samples are cut, with the relative width of each cell proportional to the cluster size. The cluster identifiers, cl = 1 to k, are annotated in each cell. The taxa that unify each cluster are displayed under each cluster identifier. When there is no taxa labeled, the cluster is too heterogeneous to be described, e.g. at (k =2, cl = 2).

Saliva: Top Cluster Unifiers

|          |    |   |  |   |   |   |   |   |   |  |   |  |
|----------|----|---|--|---|---|---|---|---|---|--|---|--|
| Cuts (k) | 2  | 1 |  | 2 |   |   |   |   |   |  |   |  |
|          | 3  | 1 |  | 2 |   | 3 |   |   |   |  |   |  |
|          | 4  | 1 |  | 2 |   | 3 |   | 4 |   |  |   |  |
|          | 5  | 1 |  | 2 | 3 |   | 4 |   | 5 |  |   |  |
|          | 6  | 1 |  | 2 | 3 |   | 4 |   | 5 |  | 6 |  |
|          | 7  | 1 |  | 2 | 3 |   | 4 |   | 5 |  | 6 |  |
|          | 8  | 1 |  | 2 | 3 |   | 4 |   | 5 |  | 6 |  |
|          | 9  | 1 |  | 2 |   | 3 | 4 |   | 5 |  | 6 |  |
|          | 10 | 1 |  | 2 |   | 3 | 4 |   | 5 |  | 6 |  |

Supplemental Figure 6, "Saliva Cluster Unifiers"

Cluster unifiers for saliva are illustrated in this figure. See the figure caption for the "Stool Cluster Unifiers" for a more thorough description.



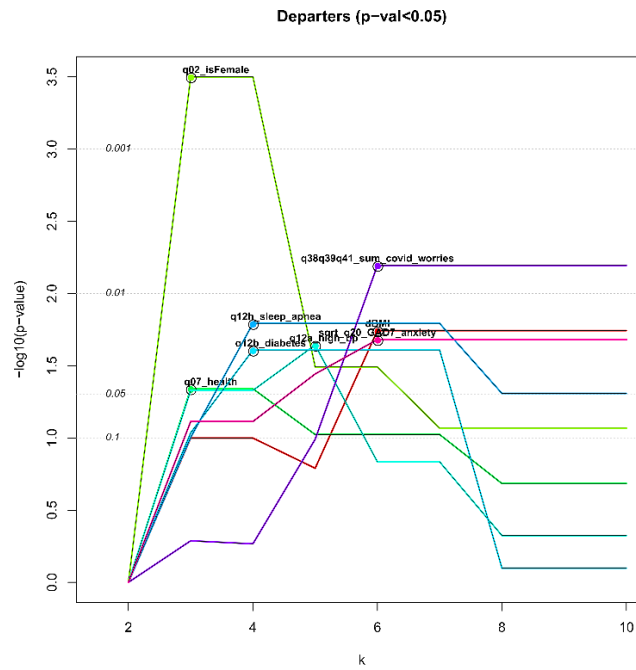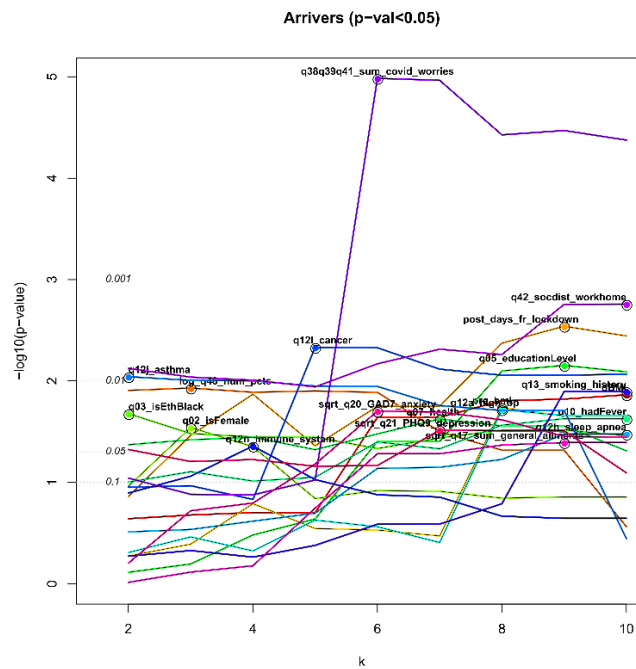

Supplemental Figure 7, “Stool Cluster Transition Associations by Cutoff”

These plots illustrate the suggested cluster  $k$  cutoff for each variable included in the cluster transition analysis. The top and bottom plots are calculated for the cluster departers and arrivers, respectively. The x-axis indicates the cluster cut  $k$  value, and the y-axis indicates the  $\log(p\text{-value})$  of the most significant association for each variable across the  $k$  clusters. The greater the p-value of the association between  $k$  and variable, the less homogeneously the variable’s values are spread across the clusters. In the departers plot, it appears that when the hierarchical clusters are split into  $k = 2$  clusters, one of the clusters has significantly more Females departing. In the arrivers plot, it appears that when the hierarchical clusters are split into  $k = 6$  clusters, the COVID worries tended to come to the same cluster.
